# Supplementary material for: Artificial Vision: The High-Frequency Electrical Stimulation of the Blind Mouse Retina Decay Spike Generation and Electrogenically Clamped Intracellular Ca2+ at Elevated Levels
Source: MDPI journal article supplement (doi:10.3390/bioengineering10101208), 2023-10-16
Supplement: s1 [file s1]

**Table S1.** Statistical analysis of Figure 4. Statistical analysis was performed to compare control frequency-ramp in (A: amplitude and B: level in middle phase) using the Wilcoxon-Mann-Whitney test. To access the impact of drugs in C and D, one-way ANOVA followed by the Dunnett's multiple comparison test was used. Significance levels were: not significant (n.s.), \*P < 0.05, \*\*P ≤ 0.01 and \*\*\*P ≤ 0.001.

| A) Statistical analysis of control amplitude in dependence to frequencies (Fig. 4A, ctr)      |                   |                   |                   |                   |                   |                   |                   |
|-----------------------------------------------------------------------------------------------|-------------------|-------------------|-------------------|-------------------|-------------------|-------------------|-------------------|
| Frequency [Hz]                                                                                | 0.5 vs 1.5        | 1.5 vs 3.0        | 3.0 vs 5.0        | 5.0 vs 10         | 10 vs 20          | 20 vs 50          |                   |
| p-Values                                                                                      | 0.99<br>(n.s.)    | 1.0<br>(n.s.)     | 0.82<br>(n.s.)    | 0.99<br>(n.s.)    | 1.04E-06<br>(***) | 0.98<br>(n.s.)    |                   |
| B) Statistical analysis of control calcium levels in dependence to frequencies (Fig. 4B, ctr) |                   |                   |                   |                   |                   |                   |                   |
| Frequency [Hz]                                                                                | 0.5 vs 1.5        | 1.5 vs 3.0        | 3.0 vs 5.0        | 5.0 vs 10         | 10 vs 20          | 20 vs 50          |                   |
| p-Values                                                                                      | 0.99<br>(n.s.)    | 0.04<br>(*)       | 0.02<br>(*)       | 0.002<br>(**)     | 0.004<br>(**)     | 0.97<br>(n.s.)    |                   |
| C) Statistical analysis of amplitude in dependence to frequencies and drugs (Fig. 4A)         |                   |                   |                   |                   |                   |                   |                   |
|                                                                                               | 0.5 Hz            | 1.5 Hz            | 3.0 Hz            | 5.0 Hz            | 10 Hz             | 20 Hz             | 50 Hz             |
| ctr - (LAP4 + CNQX)                                                                           | 1.68E-06<br>(***) | 1.47E-06<br>(***) | 1.47E-06<br>(***) | 2.46E-08<br>(***) | 2.11E-07<br>(***) | 1.21E-05<br>(***) | 1.64E-07<br>(***) |
| ctr - TTX                                                                                     | 6.43E-07<br>(***) | 3.33E-06<br>(***) | 3.33E-06<br>(***) | 5.34E-08<br>(***) | 1.45E-08<br>(***) | 3.40E-07<br>(***) | 2.56E-08<br>(***) |
| ctr - Verapamil                                                                               | 4.27E-06<br>(***) | 6.75E-06<br>(***) | 6.75E-06<br>(***) | 1.24E-07<br>(***) | 4.42E-08<br>(***) | 1.11E-06<br>(***) | 1.22E-07<br>(***) |
| (LAP4 + CNQX) - TTX                                                                           | 0.99<br>(n.s.)    | 0.84<br>(n.s.)    | 0.84<br>(n.s.)    | 0.43<br>(n.s.)    | 0.04<br>(*)       | 0.04<br>(*)       | 0.43<br>(n.s.)    |
| (LAP4 + CNQX) - Verapamil                                                                     | 1.00<br>(n.s.)    | 1.00<br>(n.s.)    | 1.00<br>(n.s.)    | 1.00<br>(n.s.)    | 0.04<br>(*)       | 0.03<br>(*)       | 0.04<br>(*)       |
| TTX - Verapamil                                                                               | 1.00<br>(n.s.)    | 0.97<br>(n.s.)    | 0.97<br>(n.s.)    | 0.92<br>(n.s.)    | 0.97<br>(n.s.)    | 1.00<br>(n.s.)    | 0.03<br>(*)       |
| D) Statistical analysis of calcium levels in dependence to frequencies and drugs (Fig. 4B)    |                   |                   |                   |                   |                   |                   |                   |
|                                                                                               | 0.5 Hz            | 1.5 Hz            | 3.0 Hz            | 5.0 Hz            | 10 Hz             | 20 Hz             | 50 Hz             |
| ctr - (LAP4 + CNQX)                                                                           | 0.39<br>(n.s.)    | 0.06<br>(n.s.)    | 1.83E-06<br>(***) | 4.75E-05<br>(***) | 3.25E-07<br>(***) | 2.70E-07<br>(***) | 2.80E-06<br>(***) |
| ctr - TTX                                                                                     | 0.01<br>(**)      | 0.71<br>(n.s.)    | 2.80E-06<br>(***) | 8.34E-07<br>(***) | 4.39E-08<br>(***) | 2.09E-08<br>(***) | 4.39E-08<br>(***) |
| ctr - Verapamil                                                                               | 0.24<br>(n.s.)    | 0.51<br>(n.s.)    | 1.15E-05<br>(***) | 3.02E-06<br>(***) | 2.01E-07<br>(***) | 9.42E-08<br>(***) | 3.02E-06<br>(***) |
| (LAP4 + CNQX) - TTX                                                                           | 0.10<br>(n.s.)    | 0.36<br>(n.s.)    | 0.97<br>(n.s.)    | 0.03<br>(*)       | 0.04<br>(*)       | 0.01<br>(**)      | 0.03<br>(*)       |
| (LAP4 + CNQX) - Verapamil                                                                     | 0.99<br>(n.s.)    | 0.89<br>(n.s.)    | 1.00<br>(n.s.)    | 0.04<br>(*)       | 0.04<br>(*)       | 0.02<br>(*)       | 0.03<br>(*)       |
| TTX - Verapamil                                                                               | 0.48<br>(n.s.)    | 0.99<br>(n.s.)    | 1.00<br>(n.s.)    | 1.00<br>(n.s.)    | 1.00<br>(n.s.)    | 1.00<br>(n.s.)    | 1.00<br>(n.s.)    |
